# Supplementary material
Source: publisher figshare collection journal article supplement (https://acs.figshare.com/ndownloader/files/6488547)
Supplement: Supplementary file 1 [file 6488547]

# Hyperbranched Copolymers Based on Glycidol and Amino Glycidyl Ether: Highly Biocompatible Polyamines Sheathed in Polyglycerols

Suhee Song,<sup>1†</sup> Joonhee Lee,<sup>1†</sup> Songa Kweon,<sup>1</sup> Jaeun Song,<sup>1</sup> Kyuseok Kim,<sup>2</sup> and Byeong-Su  
Kim<sup>1\*</sup>

<sup>1</sup>Department of Chemistry, School of Natural Science, Ulsan National Institute of Science  
and Technology (UNIST), Ulsan 44919, Korea

<sup>2</sup>Department of Emergency Medicine, Seoul National University Bundang Hospital,  
Seongnam, Gyeonggi-do 13620, Korea

E-mail: bskim19@unist.ac.kr

<sup>†</sup> These authors contributed equally to this work.

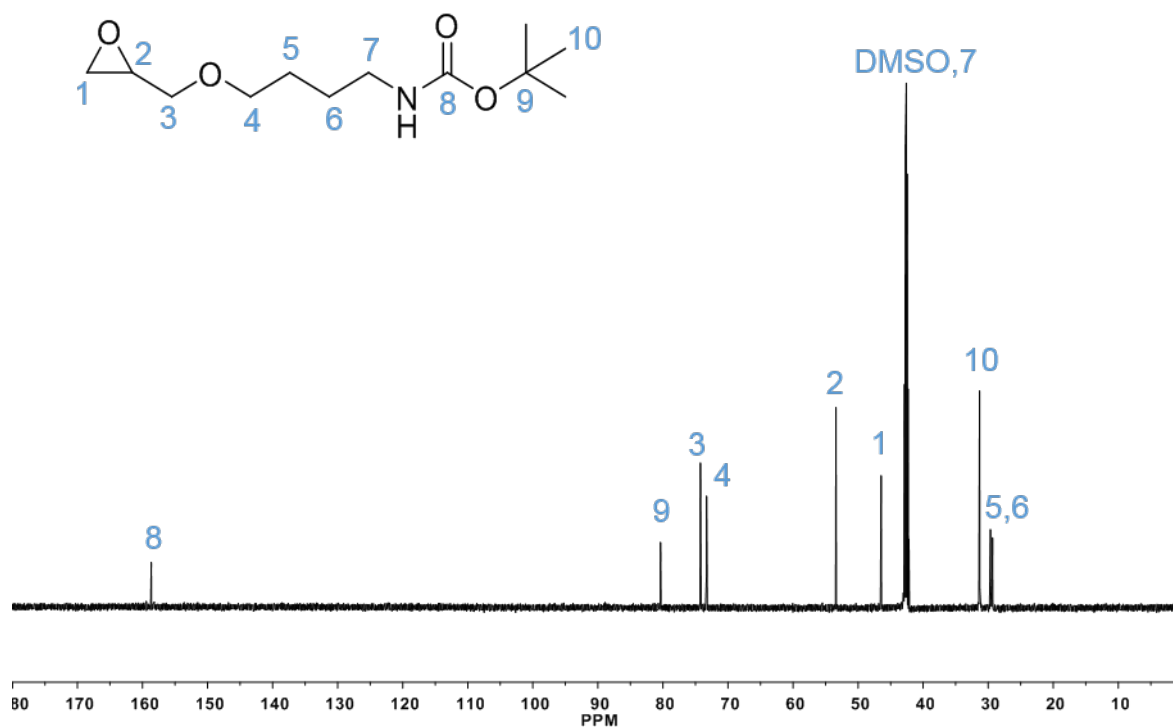

**Figure S1.**  $^{13}\text{C}$  NMR spectrum of BBAG monomer in  $\text{DMSO}-d_6$ .

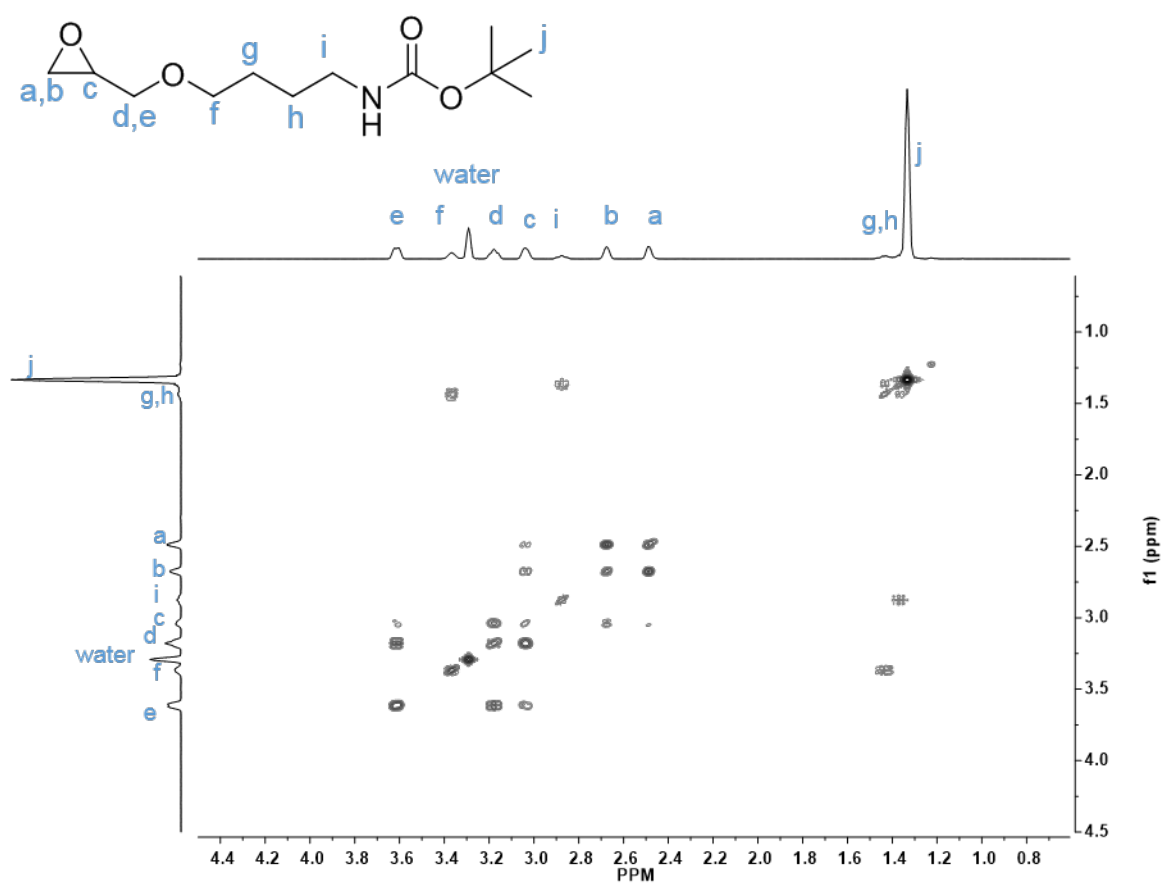

**Figure S2.** COSY spectrum of BBAG monomer in DMSO-*d*<sub>6</sub>.

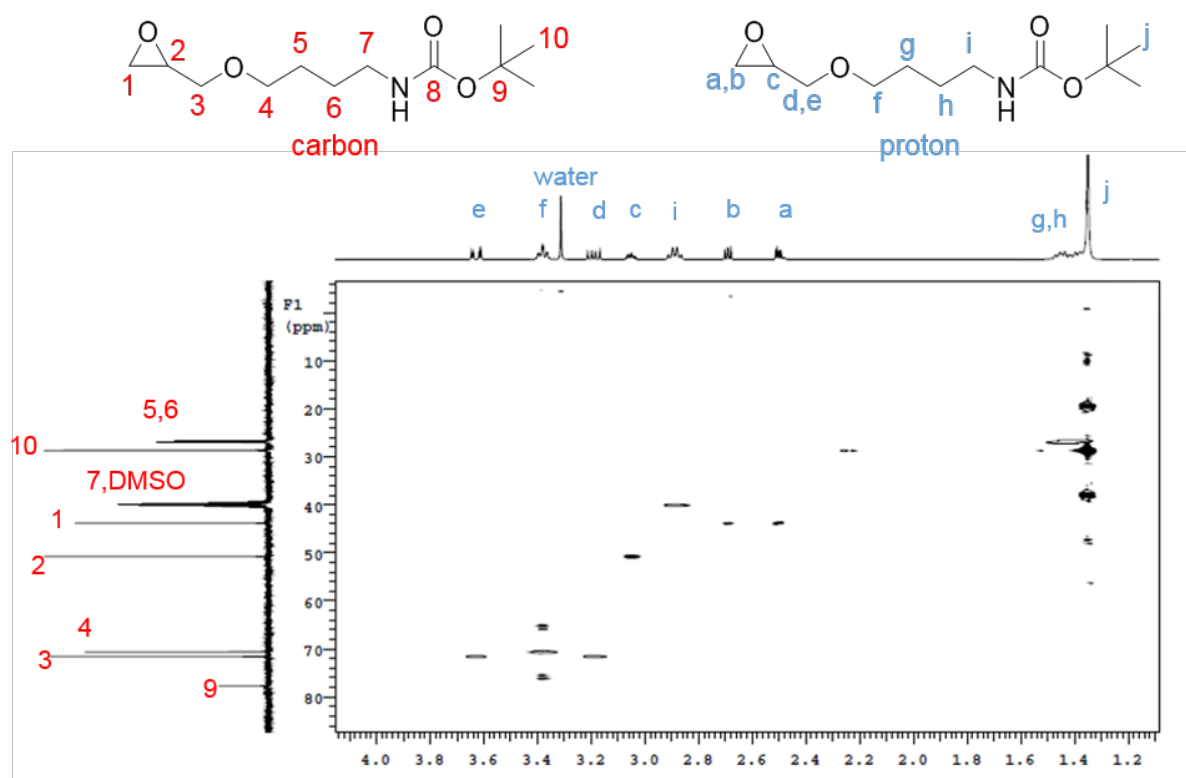

**Figure S3.** HMQC spectrum of BBAG monomer in DMSO-*d*<sub>6</sub>.

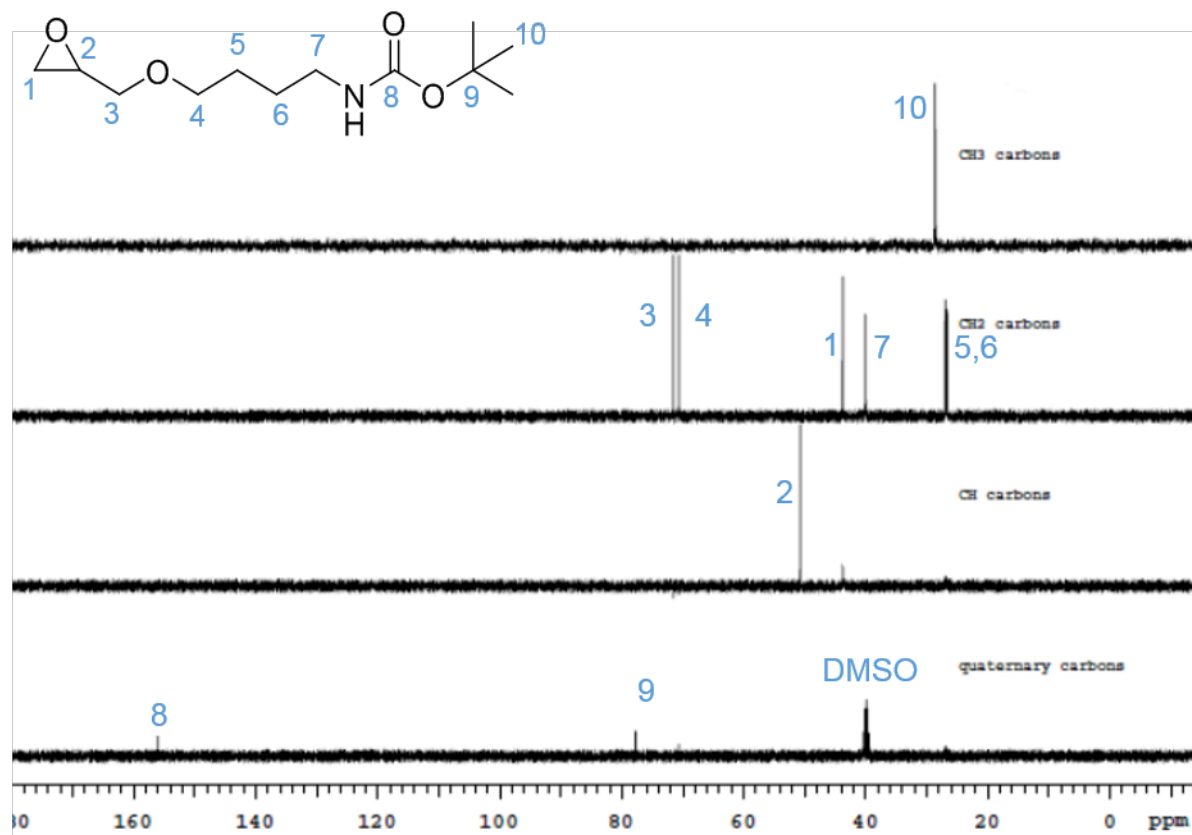

**Figure S4.** DEPT spectra of BBAG monomer in DMSO- $d_6$ .

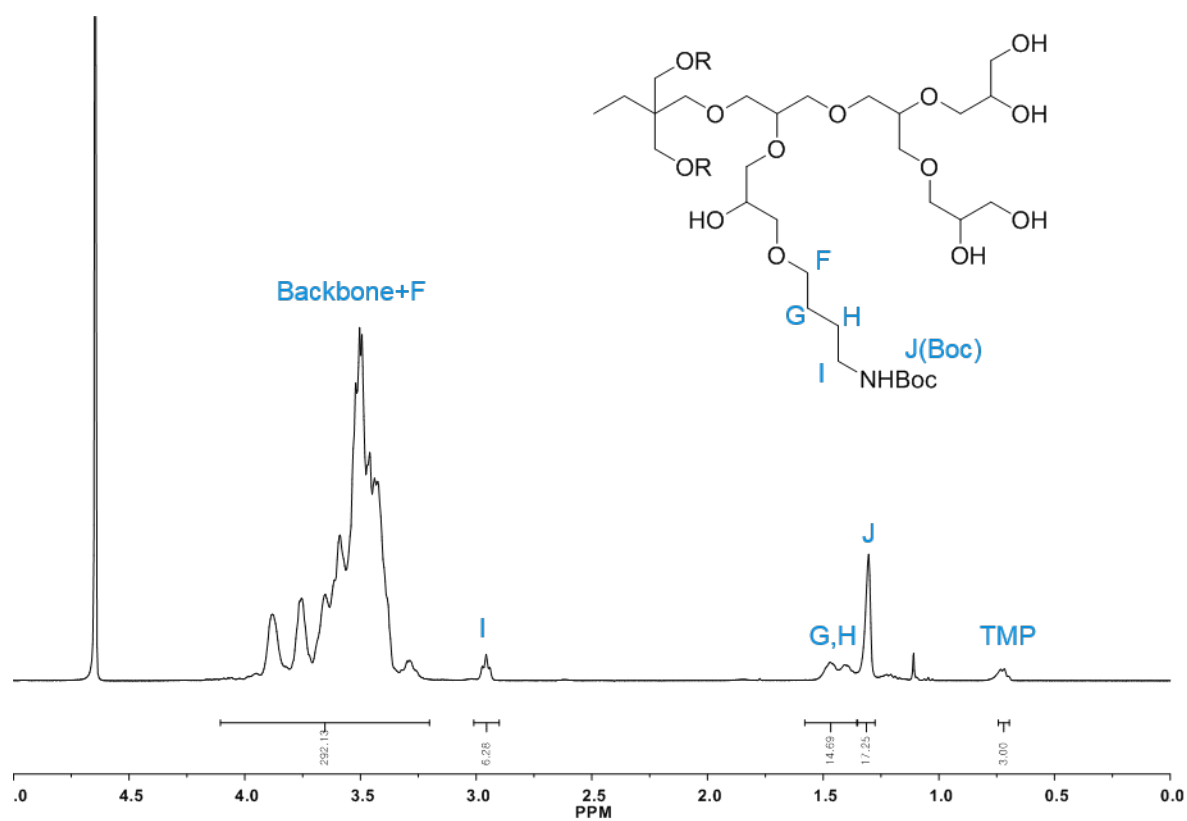

**Figure S5.**  $^1\text{H}$  NMR spectrum of  $\text{P}(\text{G}_{56}\text{-co-BBAG}_2)$  polymer (polymer 1) in  $\text{D}_2\text{O}$ .

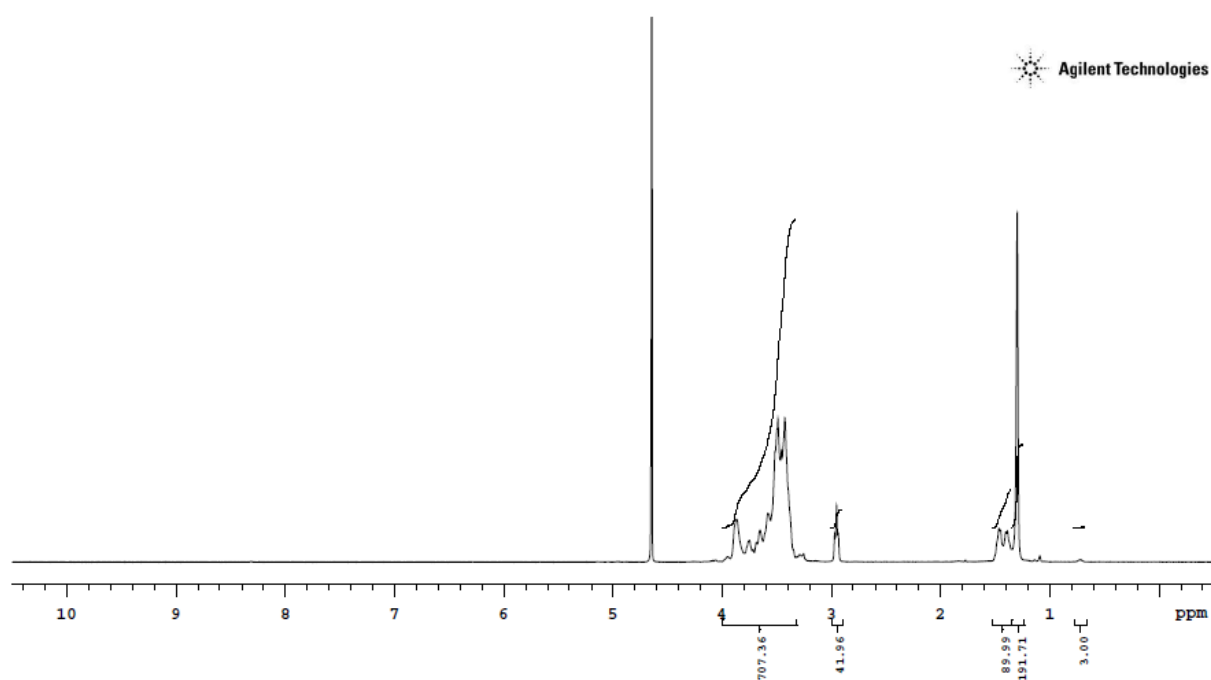

**Figure S6.**  $^1\text{H}$  NMR spectrum of P(G<sub>113</sub>-co-BBAG<sub>21</sub>) polymer (polymer 7) in D<sub>2</sub>O.

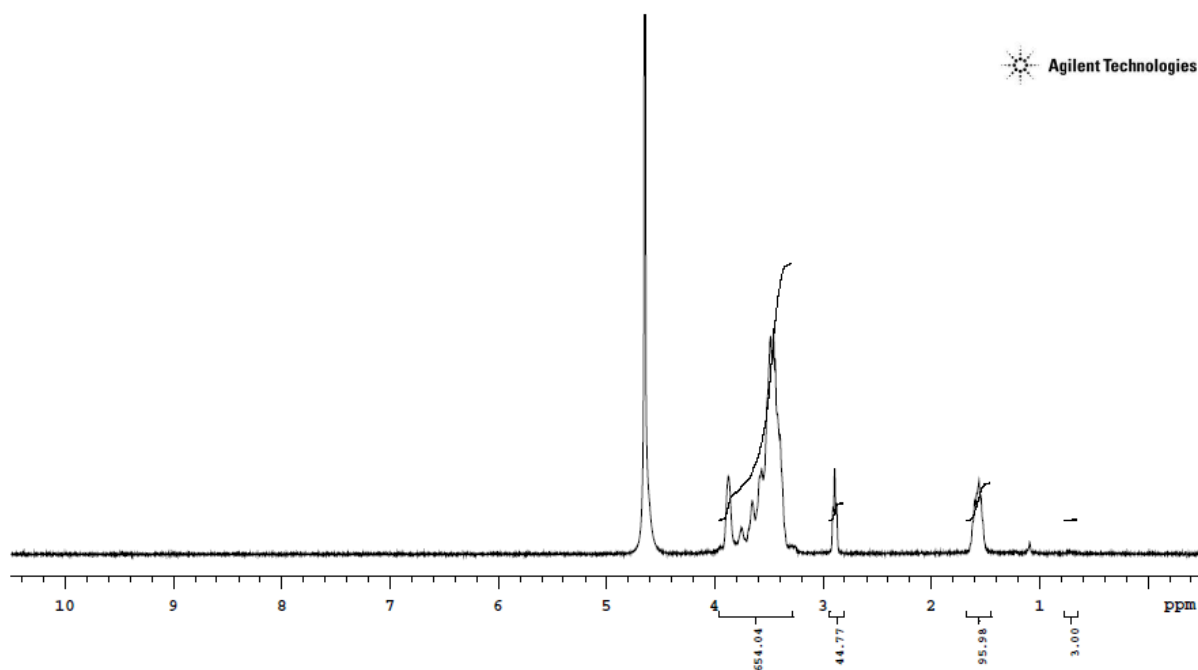

**Figure S7.**  $^1\text{H}$  NMR spectrum of P(G<sub>113</sub>-co-BAG<sub>21</sub>) polymer (deprotected polymer 7) in D<sub>2</sub>O.



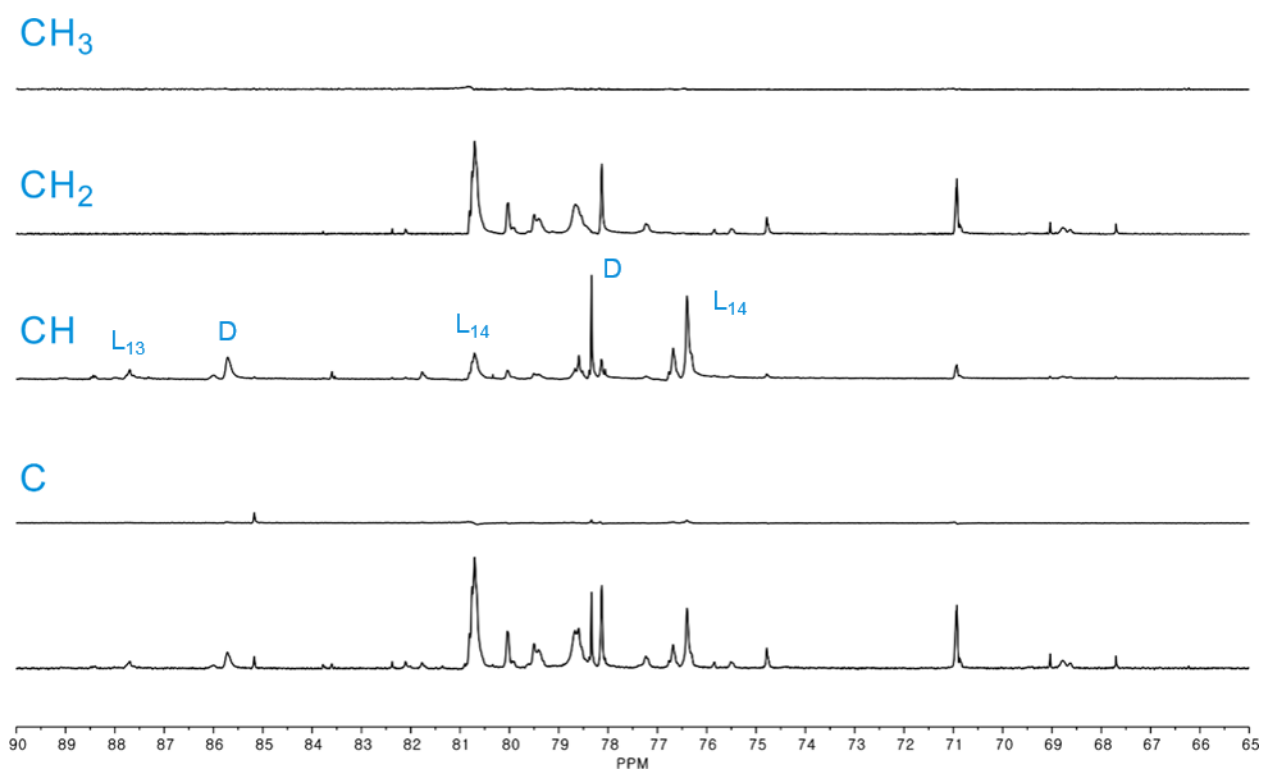

**Figure S8.** DEPT spectra of P(G<sub>113</sub>-co-BBAG<sub>21</sub>) polymer (polymer 7) in DMSO-*d*<sub>6</sub>.

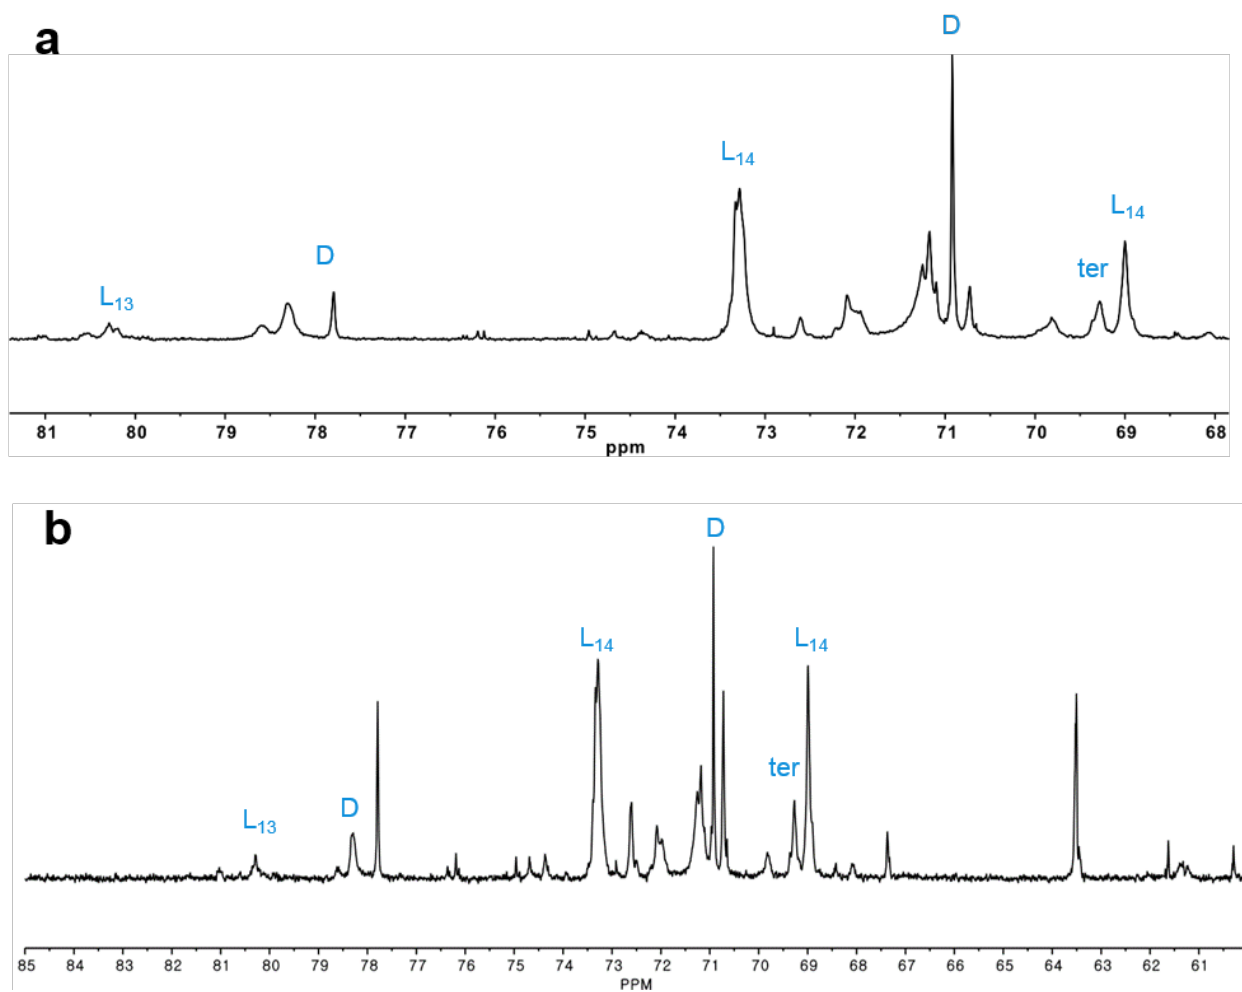

**Figure S9.** Detailed  $^{13}\text{C}$  NMR spectrum of (a)  $\text{P}(\text{G}_{149}\text{-co-BBAG}_{11})$  polymer (polymer 5) and (b)  $\text{P}(\text{G}_{113}\text{-co-BBAG}_{21})$  polymer (polymer 7) in  $\text{DMSO-}d_6$ .

**Calculation of Degree of Branching**

Using relative integral values from  $^{13}\text{C}$  NMR in Table S1, degree of branching (DB) of the copolymers was determined according to the equation for AB/AB<sub>2</sub> systems below.

$$DB_{AB/AB_2} = \frac{2D}{2D + \sum L}$$

**Table S1.** Calculation of degree of branching based on the  $^{13}\text{C}$  NMR spectra of copolymers.

| Region          | Chemical Shift (ppm) | Relative Integral Values |           |
|-----------------|----------------------|--------------------------|-----------|
|                 |                      | Polymer 5                | Polymer 7 |
| L <sub>13</sub> | 80.0-81.5            | 1.00                     | 1.00      |
| D               | 78.0-78.5            | 3.19                     | 3.53      |
| L <sub>14</sub> | 73.0-73.5            | 4.22                     | 4.80      |
| D               | 70.5-71.0            | 6.13                     | 8.42      |
| Terminal        | 68.7-69.2            | 2.60                     | 5.13      |
| L <sub>14</sub> | 69.2-69.5            | 5.54                     | 13.7      |

$$DB_{polymer\ 5} = \frac{\{2 \times (3.19 + 6.13)\}}{\{2 \times (3.19 + 6.13) + (1 + 4.22 + 5.54)\}} = 0.63$$

$$DB_{polymer\ 7} = \frac{\{2 \times (3.53 + 8.42)\}}{\{2 \times (3.53 + 8.42) + (1 + 4.80 + 13.07)\}} = 0.56$$

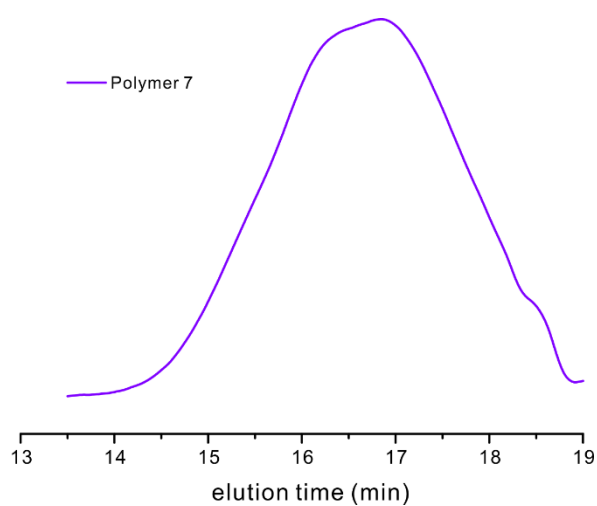

**Figure S10.** Representative gel permeation chromatogram of P(G<sub>113</sub>-*co*-BBAG<sub>21</sub>) polymer (polymer 7).

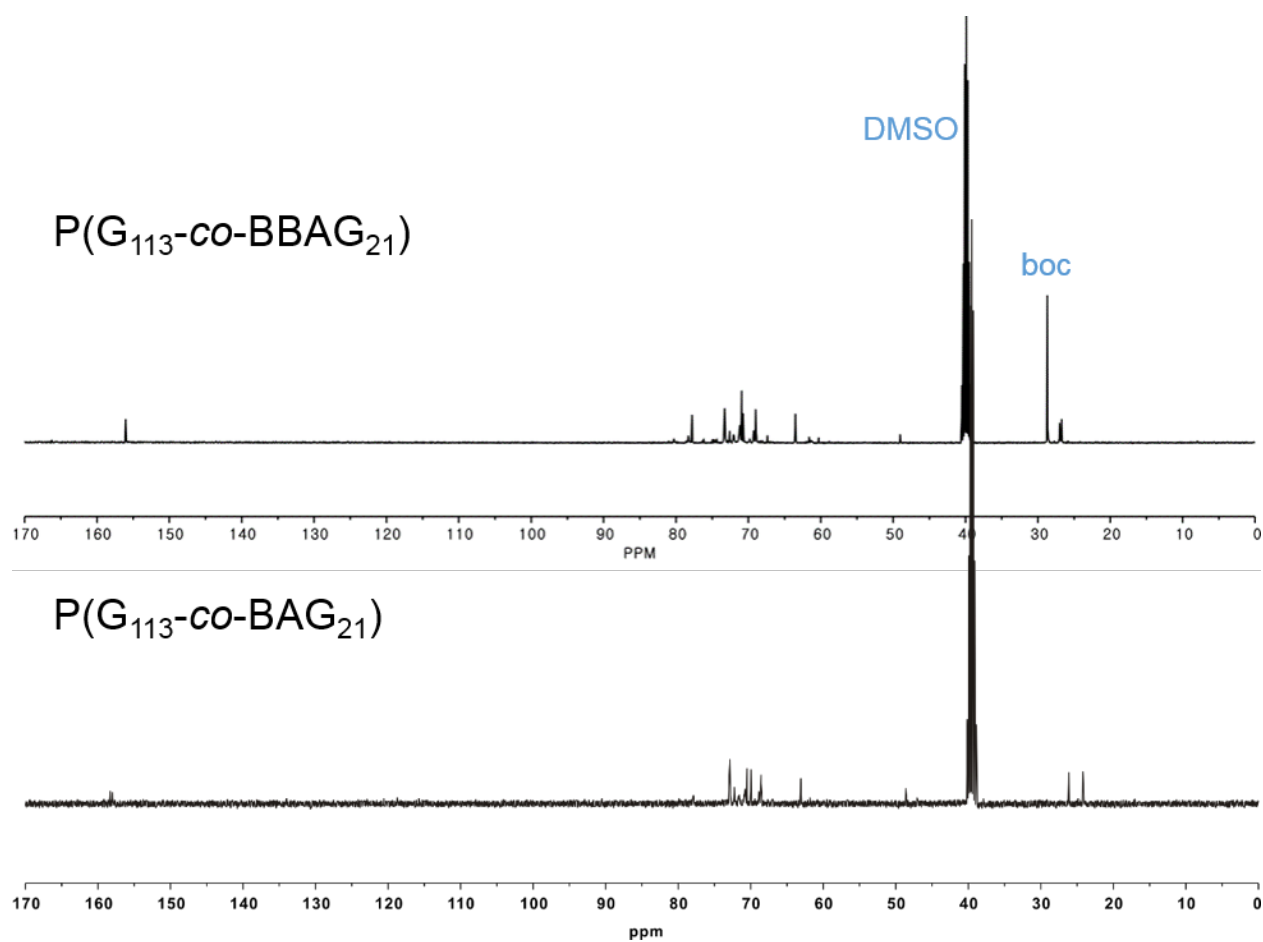

**Figure S11.**  $^{13}\text{C}$  NMR spectrum of  $\text{P}(\text{G}_{113}\text{-co-BBAG}_{21})$  polymer (polymer 7) and  $\text{P}(\text{G}_{113}\text{-co-BAG}_{21})$  polymer in  $\text{DMSO-}d_6$ .

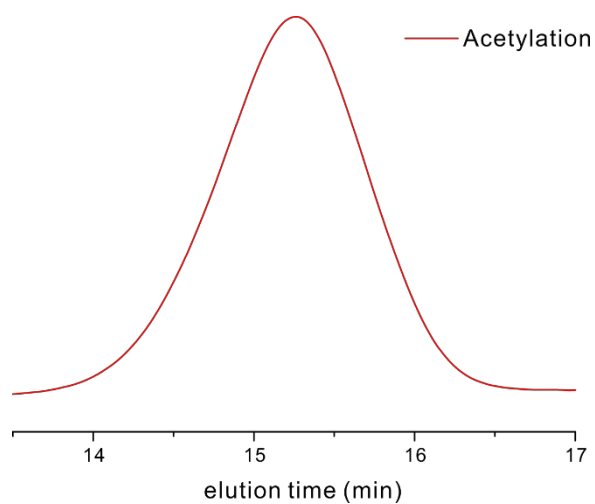

**Figure S12.** Gel permeation chromatogram of acetylated P(G<sub>113</sub>-*co*-BAG<sub>21</sub>) polymer (polymer 7).
